# Supplementary material for: Synthesis and structures of mononuclear and dinuclear gallium complexes with α-diimine ligands: reduction of the metal or ligand?
Source: Royal Society of Chemistry journal article supplement (doi:10.1039/c5dt03372a), 2015-11-10
Supplement: c5dt03372a1.pdf [file c5dt03372a1.pdf]

**Supporting Information**

**Synthesis and Structures of Mononuclear and Dinuclear Gallium  
Complexes with  $\alpha$ -Diimine Ligands: Reduction of Metal or Ligand?**

Yanxia Zhao<sup>a\*</sup>, Yanyan Liu<sup>a</sup>, Qian-Shu Li<sup>b</sup>, Ji-Hu Su<sup>c</sup>

<sup>a</sup> Key Laboratory of Synthetic and Natural Functional Molecule Chemistry of the Ministry of Education, College of Chemistry and Materials Science, Northwest University, Xi'an 710127, China. E-mail: zhaoyx@nwu.edu.cn

<sup>b</sup> Center for Computational Quantum Chemistry, South China Normal University, Guangzhou 510631, China

<sup>c</sup> Department of Modern Physics, University of Science and Technology of China, Hefei 230026, China

---

**Table of contents:**

**S1. Experimental details**

**Table S1.** Crystal data and refinement details for compounds **2–6**.

**Fig. S1.** EPR spectrum of complex **3**.

**Fig. S2.** The solid-state EPR signal of compound **5** at roomtemperature.

**S2. DFT computations**

**Figure S3.** Optimized structures of **2H–6H** and their selected bond lengths and bond orders.

**Table S2.** Natural charges of the model compounds **1H–6H**.

**Table S3–S7.** Cartesian coordinates of the optimized geometry for **2H–6H**.

## Experimental Section

**Table S1.** Crystallographic data and refinement details for compounds 2–7.

| Compound                                                                             | <b>2</b>                                                                          | <b>3</b>                                                                         | <b>4</b>                                                                       |
|--------------------------------------------------------------------------------------|-----------------------------------------------------------------------------------|----------------------------------------------------------------------------------|--------------------------------------------------------------------------------|
| Empirical formula                                                                    | C <sub>44</sub> H <sub>72</sub> Cl <sub>2</sub> GaN <sub>2</sub> NaO <sub>4</sub> | C <sub>80</sub> H <sub>128</sub> Ga <sub>2</sub> N <sub>4</sub> NaO <sub>6</sub> | C <sub>35</sub> H <sub>48</sub> Cl <sub>6</sub> Ga <sub>2</sub> N <sub>2</sub> |
| Fw                                                                                   | 856.65                                                                            | 1404.29                                                                          | 848.89                                                                         |
| Crystal system                                                                       | Monoclinic                                                                        | Monoclinic                                                                       | Monoclinic                                                                     |
| Space group                                                                          | <i>P2(1)/c</i>                                                                    | <i>P2(1)/n</i>                                                                   | <i>P2(1)</i>                                                                   |
| <i>a</i> /Å                                                                          | 15.511(1)                                                                         | 13.817(1)                                                                        | 12.039(1)                                                                      |
| <i>b</i> /Å                                                                          | 13.646(1)                                                                         | 17.598(1)                                                                        | 13.907(1)                                                                      |
| <i>c</i> /Å                                                                          | 22.867(2)                                                                         | 32.893(3)                                                                        | 12.714(1)                                                                      |
| $\alpha$ /°                                                                          | 90                                                                                | 90                                                                               | 90                                                                             |
| $\beta$ /°                                                                           | 95.466 (1)                                                                        | 94.644(1)                                                                        | 105.968(1)                                                                     |
| $\gamma$ /°                                                                          | 90                                                                                | 90                                                                               | 90                                                                             |
| <i>V</i> /Å <sup>3</sup>                                                             | 4817.8(7)                                                                         | 7971.5(1)                                                                        | 2046.5(3)                                                                      |
| <i>Z</i>                                                                             | 4                                                                                 | 4                                                                                | 2                                                                              |
| <i>D</i> <sub>calc</sub> /g cm <sup>-3</sup>                                         | 1.181                                                                             | 1.170                                                                            | 1.378                                                                          |
| <i>F</i> (000)                                                                       | 1832                                                                              | 3028                                                                             | 872                                                                            |
| $\mu$ /mm <sup>-1</sup>                                                              | 0.730                                                                             | 0.732                                                                            | 1.734                                                                          |
| Reflns collected                                                                     | 23915                                                                             | 51542                                                                            | 13599                                                                          |
| Independent                                                                          | 8497                                                                              | 13968                                                                            | 7029                                                                           |
| reflns                                                                               |                                                                                   |                                                                                  |                                                                                |
| ( <i>R</i> <sub>int</sub> )                                                          | 0.0312                                                                            | 0.0594                                                                           | 0.0230                                                                         |
| Observed reflns[ <i>I</i> > 2 $\sigma$ ( <i>I</i> )]                                 | 6246                                                                              | 9424                                                                             | 6710                                                                           |
| <i>R</i> <sub>1</sub> ; <i>wR</i> <sub>2</sub> [ <i>I</i> > 2 $\sigma$ ( <i>I</i> )] | 0.0444; 0.1362                                                                    | 0.1053; 0.1926                                                                   | 0.0262; 0.0281                                                                 |
| <i>R</i> <sub>1</sub> ; <i>wR</i> <sub>2</sub> (all data)                            | 0.0666; 0.1556                                                                    | 0.1472; 0.2123                                                                   | 0.0605; 0.0614                                                                 |
| GOF ( <i>F</i> <sup>2</sup> )                                                        | 1.057                                                                             | 1.123                                                                            | 1.007                                                                          |

| Compound          | <b>5</b>                                                                       | <b>6</b>                                                                       |
|-------------------|--------------------------------------------------------------------------------|--------------------------------------------------------------------------------|
| Empirical formula | C <sub>48</sub> H <sub>64</sub> Cl <sub>2</sub> Ga <sub>2</sub> N <sub>4</sub> | C <sub>40</sub> H <sub>48</sub> Cl <sub>2</sub> Ga <sub>2</sub> N <sub>4</sub> |
| Fw                | 907.38                                                                         | 795.16                                                                         |
| Crystal system    | Monoclinic                                                                     | Triclinic                                                                      |
| Space group       | <i>P2(1)/c</i>                                                                 | <i>P-1</i>                                                                     |
| <i>a</i> /Å       | 21.791(1)                                                                      | 8.3517(19)                                                                     |

|                                      |                |                |
|--------------------------------------|----------------|----------------|
| $b / \text{\AA}$                     | 13.884(1)      | 11.301(3)      |
| $c / \text{\AA}$                     | 15.558(1)      | 11.780(3)      |
| $\alpha / ^\circ$                    | 90             | 116.796(3)     |
| $\beta / ^\circ$                     | 91.794(1)      | 92.365(4)      |
| $\gamma / ^\circ$                    | 90             | 93.472(4)      |
| $V / \text{\AA}^3$                   | 4704.5(4)      | 987.7(4)       |
| $Z$                                  | 4              | 1              |
| $D_{\text{calc}} / \text{g cm}^{-3}$ | 1.267          | 1.337          |
| $F(000)$                             | 1864           | 412            |
| $\mu / \text{mm}^{-1}$               | 1.294          | 1.531          |
| Reflns collected                     | 23344          | 4927           |
| Independent reflns                   | 8294           | 3430           |
| $(R_{\text{int}})$                   | 0.0286         | 0.0228         |
| Observed reflns [ $I > 2\sigma(I)$ ] | 6033           | 2621           |
| $R_1; wR_2 [I > 2\sigma(I)]$         | 0.0429; 0.0911 | 0.0443; 0.0946 |
| $R_1; wR_2$ (all data)               | 0.0653; 0.1006 | 0.0662; 0.1052 |
| GOF ( $F^2$ )                        | 1.067          | 1.006          |

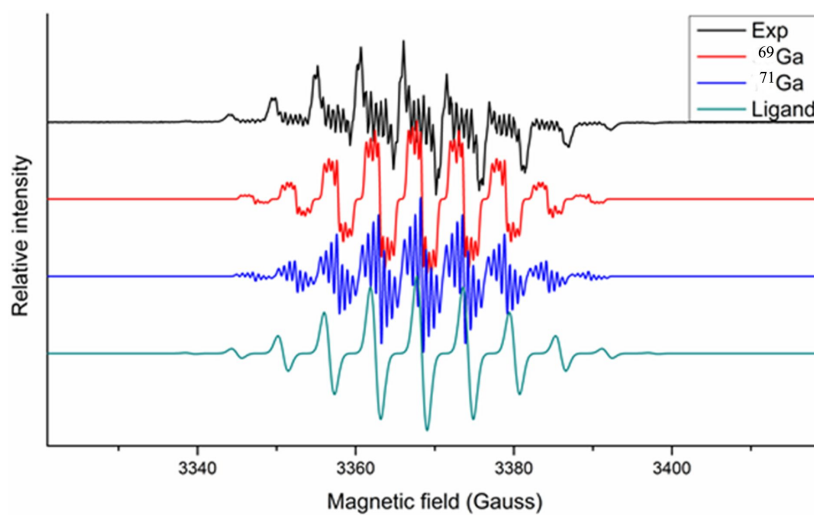

**Fig. S1.** EPR spectrum of complex **3**

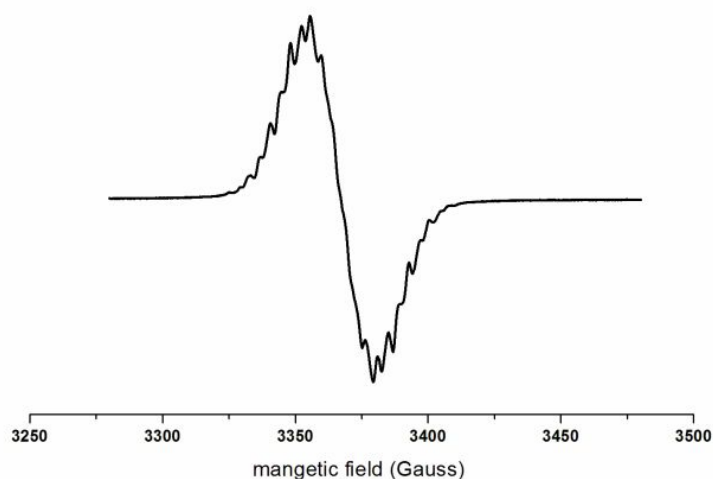

**Fig. S2.** The solid-state EPR spectrum of **5** recorded at room temperature

## S2. DFT computations

The structure optimization and NBO bonding analysis for the compound  $[(L'Ga(\mu_2-Cl)_2Na(H_2O)_4)]$  (**2H**),  $[L'GaGaL']^-$  (**3H**)  $[LGaCl_2][GaCl_4]$   $[(LGaCl_2) \cdot (GaCl_4)]$  (**4H**) ( $L' = (NArCH)_2$ ),  $[(L^{Et})ClGa-GaCl(L^{Et})]$  (**5H**) and  $[(L^{Me})ClGa-GaCl(L^{Me})]$  (**6H**) were carried out at the DFT (B3LYP) level with a 6-31g\* basis set using the Gaussian 09 program.<sup>1</sup> The B3LYP method is a hybrid of the HF and DFT methods, incorporating Becke's three-parameter exchange functional (B3)<sup>2</sup> with the Lee, Yang, and Parr (LYP) correlation functional. Geometry optimizations gave bond distances that were in good agreement with the X-ray structures. Bonding analyses were performed by means of natural bond orbital (NBO) analysis and natural population analysis (NPA). Wiberg bond indices (WBI) were evaluated with Weinhold's natural bond orbital method.<sup>3</sup>

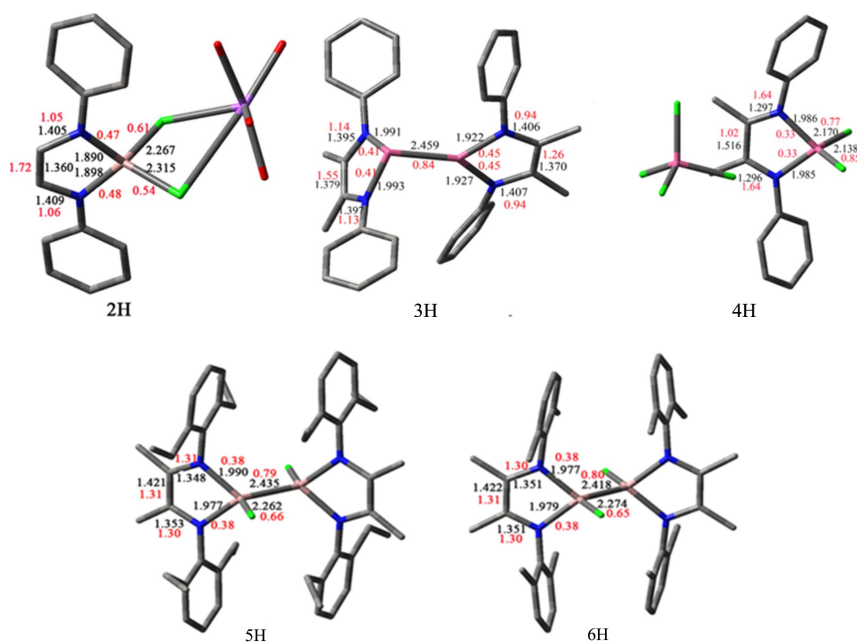

**Fig. S3.** Optimized structures of **2H–6H** and their selected bond lengths (black) and bond orders (red).

**Table S2.** Natural charges of the model compounds **1H–6H**.

|    | <b>1H</b> | <b>2H</b> | <b>3H</b>    | <b>5H</b> | <b>6H</b> |
|----|-----------|-----------|--------------|-----------|-----------|
| Ga | 1.415     | 1.561     | 0.533, 0.476 | 1.077     | 1.075     |
| L  | -0.461    | -1.314    | -1.010       | -0.550    | -0.546    |

**Table S3.** Cartesian coordinates of the optimized geometry for **2H**.

|    |             |             |             |   |             |             |             |
|----|-------------|-------------|-------------|---|-------------|-------------|-------------|
| Ga | -0.54093100 | 0.32425000  | 0.24318900  | C | -6.01626000 | -0.78813100 | -0.47467000 |
| Na | 1.89977700  | -2.87049500 | -0.56751200 | H | -6.97675200 | -1.28033200 | -0.61769000 |
| Cl | -0.12981500 | -1.07768900 | 2.03931800  | C | -5.84750900 | 0.56476500  | -0.80123600 |
| Cl | 0.11169500  | -1.00051300 | -1.47589600 | H | -6.68185400 | 1.13322700  | -1.21264300 |
| N  | -2.25877400 | 1.09817500  | 0.09749400  | C | -4.61593500 | 1.20528800  | -0.62361500 |
| N  | 0.26909000  | 2.04023400  | 0.25345000  | C | 1.60067200  | 2.40893100  | 0.12065100  |
| O  | 3.58330100  | -3.70756800 | -1.89873200 | C | 2.00393600  | 3.60227500  | -0.53022800 |
| O  | 2.80761500  | -2.32159300 | 1.66484400  | C | 3.35741100  | 3.93690000  | -0.64152800 |
| O  | 3.86164000  | -1.26738200 | -0.72224300 | H | 3.63180800  | 4.85862200  | -1.15481400 |
| O  | 0.17979300  | -4.00361500 | 0.54274800  | C | 4.35884700  | 3.10467100  | -0.11887800 |
| C  | -2.05952600 | 2.48835500  | 0.07810100  | H | 5.40982800  | 3.37468700  | -0.20333100 |
| C  | -0.78764900 | 2.96537800  | 0.14441700  | C | 3.97153800  | 1.92222400  | 0.53328700  |
| C  | -3.50469100 | 0.50340300  | -0.09685500 | H | 4.72969000  | 1.28281800  | 0.98867600  |
| C  | -3.68708700 | -0.86185400 | 0.23070100  | C | 2.62053000  | 1.57837700  | 0.65242400  |
| C  | -4.91720500 | -1.49410400 | 0.04088800  | H | 2.33002400  | 0.69521500  | 1.22131700  |
| H  | -5.02249100 | -2.54536400 | 0.31025000  | H | 1.25312900  | 4.25157000  | -0.97487600 |

|   |             |             |             |   |             |             |             |
|---|-------------|-------------|-------------|---|-------------|-------------|-------------|
| H | -2.85675400 | -1.41957500 | 0.66416600  | H | 3.72840000  | -0.31544500 | -0.87652800 |
| H | -4.51257700 | 2.24609000  | -0.92136700 | H | 3.90425700  | -1.36431500 | 0.24699300  |
| H | -0.21356600 | -3.28355800 | 1.07427100  | H | 3.10301200  | -2.94426500 | 2.34580700  |
| H | -0.56999900 | -4.47433200 | 0.15038800  | H | 2.03130100  | -1.85747200 | 2.04479800  |
| H | 3.90026300  | -4.19749800 | -2.66874700 | H | -0.57527400 | 4.02737300  | 0.22263600  |
| H | 4.09040900  | -2.87391500 | -1.84461000 | H | -2.91694000 | 3.15315400  | 0.10059500  |

**Table S4.** Cartesian coordinates of the optimized geometry for **3H**

|    |             |             |             |   |             |             |             |
|----|-------------|-------------|-------------|---|-------------|-------------|-------------|
| Ga | -0.46083500 | 1.25307900  | 1.01466900  | C | 4.65564000  | -0.39592500 | 0.45948300  |
| Ga | 0.66126900  | -0.81702300 | 0.30733400  | C | -1.94247000 | 2.14163100  | -1.21877000 |
| N  | 0.44533300  | -2.41632200 | -0.74490400 | C | -2.85948500 | 1.43875900  | -0.46598600 |
| N  | 2.44125200  | -1.47990100 | 0.60198000  | C | -2.28791400 | 2.72858900  | -2.56895500 |
| N  | -0.63359400 | 2.18279000  | -0.73705000 | H | -1.39770700 | 2.79410100  | -3.20099000 |
| N  | -2.38266500 | 0.83153600  | 0.69824900  | H | -2.72141900 | 3.73899400  | -2.51985800 |
| C  | 1.60681200  | -3.21016400 | -0.74909900 | H | -3.01502600 | 2.10134900  | -3.09432000 |
| C  | 2.66864500  | -2.70968900 | -0.04093700 | C | -4.27834600 | 1.20392600  | -0.93366200 |
| C  | 1.56095000  | -4.58586200 | -1.36709000 | H | -4.31762800 | 1.07941400  | -2.02060300 |
| H  | 2.32495700  | -5.24200900 | -0.94204600 | H | -4.97376000 | 2.01990900  | -0.68420600 |
| H  | 1.70739800  | -4.58883200 | -2.45595700 | H | -4.68503700 | 0.29090400  | -0.48987100 |
| H  | 0.58553600  | -5.05407800 | -1.18570900 | C | 0.35824200  | 3.03525400  | -1.21386100 |
| C  | 3.95847600  | -3.44684300 | 0.21433300  | C | 1.70711800  | 2.61013100  | -1.14532200 |
| H  | 3.87230600  | -4.50726900 | -0.03508200 | C | 2.74905000  | 3.42818000  | -1.56401700 |
| H  | 4.24060000  | -3.37507600 | 1.27306900  | H | 3.76892100  | 3.05493000  | -1.49924300 |
| H  | 4.80972600  | -3.05396300 | -0.35800500 | C | 2.49909800  | 4.71208400  | -2.06069700 |
| C  | -0.63982100 | -2.63738800 | -1.60464700 | H | 3.31573300  | 5.34933200  | -2.39122600 |
| C  | -0.48165300 | -2.88641000 | -2.98441300 | C | 1.17769700  | 5.16109500  | -2.10933400 |
| C  | -1.58673200 | -3.05759100 | -3.81556000 | H | 0.95751400  | 6.16633200  | -2.46571800 |
| H  | -1.43040600 | -3.25158500 | -4.87523800 | C | 0.12753900  | 4.35035500  | -1.68150000 |
| C  | -2.88402200 | -2.95314900 | -3.30801000 | C | -3.18988200 | 0.33308400  | 1.71355900  |
| H  | -3.74519700 | -3.08127600 | -3.95929000 | C | -4.44352500 | 0.87527000  | 2.08606800  |
| C  | -3.05439800 | -2.67284000 | -1.94985500 | C | -5.18137800 | 0.33689800  | 3.13850100  |
| H  | -4.05504600 | -2.57886800 | -1.53380700 | H | -6.14203600 | 0.78292800  | 3.39180500  |
| C  | -1.95424900 | -2.51625900 | -1.11028000 | C | -4.69660400 | -0.74149400 | 3.88242800  |
| C  | 3.46782100  | -0.70197900 | 1.15686900  | H | -5.27521700 | -1.15590600 | 4.70426700  |
| C  | 3.28099100  | -0.10607800 | 2.42032700  | C | -3.44290000 | -1.26751100 | 3.55206300  |
| C  | 4.25044600  | 0.72818200  | 2.97205800  | H | -3.03517200 | -2.10162400 | 4.12004900  |
| H  | 4.07591900  | 1.17056900  | 3.95034700  | C | -2.70393600 | -0.74255800 | 2.49865500  |
| C  | 5.43573400  | 0.99840100  | 2.28366100  | H | -0.88310600 | 4.74338600  | -1.68235700 |
| H  | 6.19199800  | 1.64747200  | 2.71802700  | H | 1.92145500  | 1.61038300  | -0.77856600 |
| C  | 5.62857900  | 0.42703200  | 1.02351600  | H | -1.73804400 | -1.17167500 | 2.24633400  |
| H  | 6.53547200  | 0.64215500  | 0.46131100  | H | -4.82233800 | 1.74400700  | 1.55925000  |

|   |             |             |             |   |            |             |             |
|---|-------------|-------------|-------------|---|------------|-------------|-------------|
| H | -2.10084300 | -2.32918600 | -0.05083200 | H | 4.79457300 | -0.79251300 | -0.54174500 |
| H | 0.51991000  | -2.91829300 | -3.40167800 | H | 2.37710800 | -0.34122700 | 2.97470900  |

**Table S5.** Cartesian coordinates of the optimized geometry for **4H**

|    |             |             |             |    |             |             |             |
|----|-------------|-------------|-------------|----|-------------|-------------|-------------|
| Ga | -2.53547000 | 0.39879300  | -0.35689000 | C  | -1.84822300 | 5.02828400  | 0.09704000  |
| Cl | -4.46901100 | 0.78854000  | 0.54687200  | H  | -2.69241000 | 5.70673600  | 0.17436600  |
| Cl | -2.35443900 | 0.38876600  | -2.48721900 | C  | -2.02228100 | 3.68111900  | 0.40315500  |
| N  | -1.12909400 | 1.42845200  | 0.59449300  | C  | -2.05882900 | -2.49017100 | 0.29309900  |
| N  | -1.68129300 | -1.13747600 | 0.56613700  | C  | -1.10711900 | -3.39100700 | -0.20268900 |
| C  | -0.39564700 | 0.69561800  | 1.37339800  | C  | -1.51138300 | -4.68067500 | -0.54423100 |
| C  | -0.72753000 | -0.78387600 | 1.36958100  | H  | -0.77855400 | -5.38085500 | -0.93343400 |
| C  | 0.69470100  | 1.20892600  | 2.24982100  | C  | -2.84696700 | -5.06307000 | -0.40352200 |
| H  | 0.60476700  | 2.28700600  | 2.39182700  | H  | -3.15444700 | -6.06966800 | -0.67081700 |
| H  | 1.67571300  | 1.01501000  | 1.79549100  | C  | -3.79029000 | -4.14797900 | 0.07014600  |
| H  | 0.68233900  | 0.70629200  | 3.21988100  | H  | -4.83091500 | -4.44006100 | 0.17375900  |
| C  | -0.00630700 | -1.69772500 | 2.29860300  | C  | -3.40783400 | -2.84870300 | 0.39759900  |
| H  | -0.39468500 | -2.71354600 | 2.24070800  | Ga | 3.55209200  | -0.46952500 | -0.21652200 |
| H  | -0.12276900 | -1.33056800 | 3.32585300  | Cl | 1.45404000  | -0.64183600 | -1.01020900 |
| H  | 1.07183800  | -1.71321400 | 2.08628400  | Cl | 3.81708800  | 1.66946800  | 0.32027500  |
| C  | -0.91956800 | 2.81827200  | 0.33765000  | Cl | 4.99211200  | -1.16702800 | -1.68119500 |
| C  | 0.32867900  | 3.27525700  | -0.10609300 | Cl | 3.59644500  | -1.65552000 | 1.66229700  |
| C  | 0.47848000  | 4.62290700  | -0.42981900 | H  | -4.13285900 | -2.13661800 | 0.77918200  |
| H  | 1.44442100  | 4.97733600  | -0.77590500 | H  | -0.07957700 | -3.07018900 | -0.34583900 |
| C  | -0.60193600 | 5.50051000  | -0.32381900 | H  | -2.98408800 | 3.31304200  | 0.74644200  |
| H  | -0.47671400 | 6.54926600  | -0.57632800 | H  | 1.16169200  | 2.58914400  | -0.22359800 |

**Table S6.** Cartesian coordinates of the optimized geometry for **5H**

|    |            |             |             |   |            |             |             |
|----|------------|-------------|-------------|---|------------|-------------|-------------|
| Ga | 0.77662400 | -0.89609300 | -0.32822000 | C | 5.80894900 | 0.27961900  | -0.04936600 |
| N  | 2.45923700 | -1.18751800 | 0.63849200  | H | 6.66427800 | 0.09242900  | -0.69450700 |
| N  | 0.40163400 | -2.73757300 | 0.25446900  | C | 5.83934700 | 1.33942300  | 0.85015200  |
| Cl | 1.11538600 | -0.87474100 | -2.55482200 | H | 6.71284100 | 1.98408100  | 0.90633600  |
| C  | 3.48535300 | -2.59538000 | 2.40917300  | C | 4.74932700 | 1.56730000  | 1.68712200  |
| H  | 4.45697800 | -2.75131600 | 1.92310600  | H | 4.77903300 | 2.39671200  | 2.38595300  |
| H  | 3.26103800 | -3.47609800 | 3.01073700  | C | 3.61598900 | 0.74786700  | 1.64666200  |
| H  | 3.61347700 | -1.74694900 | 3.09103100  | C | 4.72684300 | -1.71583900 | -1.13026200 |
| C  | 2.40913500 | -2.31199100 | 1.39730500  | H | 5.60021400 | -2.34570600 | -0.90819500 |
| C  | 1.29430800 | -3.16128200 | 1.18198700  | H | 3.84408000 | -2.34777000 | -1.00675000 |
| C  | 1.06951400 | -4.44068600 | 1.94358600  | C | 4.80116000 | -1.25439700 | -2.59535300 |
| H  | 0.53880600 | -5.16875400 | 1.32483600  | H | 3.90857500 | -0.68049200 | -2.85649800 |
| H  | 0.45564500 | -4.27700400 | 2.84074100  | H | 4.85440900 | -2.11979000 | -3.26603700 |
| H  | 2.00975600 | -4.89332800 | 2.26385000  | H | 5.68367400 | -0.63148000 | -2.78006400 |
| C  | 3.59899900 | -0.32050400 | 0.71883800  | C | 2.43582500 | 1.00805500  | 2.56780700  |
| C  | 4.69533000 | -0.56560200 | -0.13770000 | H | 1.75222600 | 1.71671800  | 2.08305900  |

|    |             |             |             |   |             |             |             |
|----|-------------|-------------|-------------|---|-------------|-------------|-------------|
| H  | 1.85119100  | 0.09264800  | 2.69088400  | C | -5.80894900 | -0.27961900 | 0.04936600  |
| C  | 2.78747200  | 1.55931600  | 3.95619700  | H | -6.66427800 | -0.09242900 | 0.69450700  |
| H  | 3.22605500  | 2.56145700  | 3.90610900  | C | -5.83934700 | -1.33942300 | -0.85015200 |
| H  | 3.49619300  | 0.90837200  | 4.48236900  | H | -6.71284100 | -1.98408100 | -0.90633600 |
| H  | 1.87775900  | 1.63273000  | 4.56122100  | C | -4.74932700 | -1.56730000 | -1.68712200 |
| C  | -0.74029900 | -3.52881200 | -0.09716900 | H | -4.77903300 | -2.39671200 | -2.38595300 |
| C  | -1.94699400 | -3.41109300 | 0.62243300  | C | -3.61598900 | -0.74786700 | -1.64666200 |
| C  | -3.04779800 | -4.16496400 | 0.19081600  | C | -4.72684300 | 1.71583900  | 1.13026200  |
| H  | -3.99352400 | -4.06881300 | 0.71554300  | H | -5.60021400 | 2.34570600  | 0.90819500  |
| C  | -2.95247100 | -5.02123800 | -0.89896900 | H | -3.84408000 | 2.34777000  | 1.00675000  |
| H  | -3.81712100 | -5.59953600 | -1.21475500 | C | -4.80116000 | 1.25439700  | 2.59535300  |
| C  | -1.74401800 | -5.14461400 | -1.58499900 | H | -3.90857500 | 0.68049200  | 2.85649800  |
| H  | -1.67728900 | -5.82715300 | -2.42577100 | H | -4.85440900 | 2.11979000  | 3.26603700  |
| C  | -0.62114200 | -4.40384800 | -1.20645500 | H | -5.68367400 | 0.63148000  | 2.78006400  |
| C  | -2.08396400 | -2.48690900 | 1.82000600  | C | -2.43582500 | -1.00805500 | -2.56780700 |
| H  | -1.10415000 | -2.11278500 | 2.12496200  | H | -1.75222600 | -1.71671800 | -2.08305900 |
| H  | -2.65486700 | -1.59828100 | 1.51952300  | H | -1.85119100 | -0.09264800 | -2.69088400 |
| C  | -2.76492600 | -3.11998400 | 3.04364700  | C | -2.78747200 | -1.55931600 | -3.95619700 |
| H  | -3.79914800 | -3.41572200 | 2.83860600  | H | -3.22605500 | -2.56145700 | -3.90610900 |
| H  | -2.78592000 | -2.40209600 | 3.87065000  | H | -3.49619300 | -0.90837200 | -4.48236900 |
| H  | -2.22600700 | -4.01327900 | 3.38147900  | H | -1.87775900 | -1.63273000 | -4.56122100 |
| C  | 0.70512600  | -4.52994800 | -1.94042400 | C | 0.74029900  | 3.52881200  | 0.09716900  |
| H  | 0.93509700  | -3.57052100 | -2.41999400 | C | 1.94699400  | 3.41109300  | -0.62243300 |
| H  | 1.50582700  | -4.67589800 | -1.20343900 | C | 3.04779800  | 4.16496400  | -0.19081600 |
| C  | 0.78908900  | -5.64375400 | -2.98834600 | H | 3.99352400  | 4.06881300  | -0.71554300 |
| H  | 0.08276000  | -5.48578400 | -3.81125700 | C | 2.95247100  | 5.02123800  | 0.89896900  |
| H  | 0.58675000  | -6.63080900 | -2.55581500 | H | 3.81712100  | 5.59953600  | 1.21475500  |
| H  | 1.79418100  | -5.66930300 | -3.42267100 | C | 1.74401800  | 5.14461400  | 1.58499900  |
| Ga | -0.77662400 | 0.89609300  | 0.32822000  | H | 1.67728900  | 5.82715300  | 2.42577100  |
| Cl | -1.11538600 | 0.87474100  | 2.55482200  | C | 0.62114200  | 4.40384800  | 1.20645500  |
| N  | -2.45923700 | 1.18751800  | -0.63849200 | C | 2.08396400  | 2.48690900  | -1.82000600 |
| N  | -0.40163400 | 2.73757300  | -0.25446900 | H | 1.10415000  | 2.11278500  | -2.12496200 |
| C  | -3.48535300 | 2.59538000  | -2.40917300 | H | 2.65486700  | 1.59828100  | -1.51952300 |
| H  | -4.45697800 | 2.75131600  | -1.92310600 | C | 2.76492600  | 3.11998400  | -3.04364700 |
| H  | -3.26103800 | 3.47609800  | -3.01073700 | H | 3.79914800  | 3.41572200  | -2.83860600 |
| H  | -3.61347700 | 1.74694900  | -3.09103100 | H | 2.78592000  | 2.40209600  | -3.87065000 |
| C  | -2.40913500 | 2.31199100  | -1.39730500 | H | 2.22600700  | 4.01327900  | -3.38147900 |
| C  | -1.29430800 | 3.16128200  | -1.18198700 | C | -0.70512600 | 4.52994800  | 1.94042400  |
| C  | -1.06951400 | 4.44068600  | -1.94358600 | H | -0.93509700 | 3.57052100  | 2.41999400  |
| H  | -0.53880600 | 5.16875400  | -1.32483600 | H | -1.50582700 | 4.67589800  | 1.20343900  |
| H  | -0.45564500 | 4.27700400  | -2.84074100 | C | -0.78908900 | 5.64375400  | 2.98834600  |
| H  | -2.00975600 | 4.89332800  | -2.26385000 | H | -0.08276000 | 5.48578400  | 3.81125700  |
| C  | -3.59899900 | 0.32050400  | -0.71883800 | H | -0.58675000 | 6.63080900  | 2.55581500  |
| C  | -4.69533000 | 0.56560200  | 0.13770000  | H | -1.79418100 | 5.66930300  | 3.42267100  |



**Table S7.** Cartesian coordinates of the optimized geometry for **6H**

|    |             |             |             |    |             |             |             |
|----|-------------|-------------|-------------|----|-------------|-------------|-------------|
| Ga | 0.03041200  | 1.16015100  | 0.38128200  | H  | -2.73755900 | -0.08855500 | -2.00582700 |
| Cl | 0.01393000  | 1.20759100  | 2.63743900  | H  | -1.90866800 | 1.34919200  | -2.56976900 |
| N  | 1.37412800  | 2.40773600  | -0.30996700 | H  | -3.56224700 | 1.00391500  | -3.11422900 |
| N  | -1.23507400 | 2.47987200  | -0.32929100 | C  | -2.37495300 | 3.96130300  | 1.85234000  |
| C  | 1.65757800  | 4.27324400  | -1.93267800 | H  | -1.73062200 | 3.30891300  | 2.45149700  |
| H  | 2.46069600  | 4.71761700  | -1.33443100 | H  | -3.00345700 | 4.54253700  | 2.53436500  |
| H  | 1.06987100  | 5.08007500  | -2.37228600 | H  | -1.71329800 | 4.65823000  | 1.32500400  |
| H  | 2.14374500  | 3.72977900  | -2.75393100 | Ga | -0.03041700 | -1.16012500 | -0.38124500 |
| C  | 0.80829600  | 3.35538400  | -1.09749500 | Cl | -0.01392100 | -1.20754800 | -2.63740300 |
| C  | -0.60938700 | 3.39770300  | -1.10715700 | N  | -1.37412800 | -2.40773200 | 0.30997700  |
| C  | -1.37906600 | 4.37515600  | -1.95749200 | N  | 1.23507300  | -2.47985000 | 0.32930900  |
| H  | -2.43248500 | 4.39165400  | -1.67332800 | C  | -1.65757000 | -4.27329700 | 1.93262400  |
| H  | -1.32883900 | 4.11402700  | -3.02346900 | H  | -2.46065100 | -4.71769600 | 1.33434800  |
| H  | -0.98705300 | 5.39205300  | -1.85402000 | H  | -1.06984800 | -5.08010900 | 2.37224700  |
| C  | 2.79768800  | 2.32616900  | -0.16953700 | H  | -2.14378400 | -3.72985400 | 2.75386300  |
| C  | 3.39706600  | 3.01394200  | 0.91066900  | C  | -0.80829100 | -3.35540100 | 1.09747800  |
| C  | 4.78458700  | 2.93442600  | 1.06305100  | C  | 0.60939000  | -3.39770900 | 1.10714600  |
| H  | 5.25438900  | 3.46565100  | 1.88737200  | C  | 1.37907100  | -4.37518800 | 1.95745100  |
| C  | 5.56475900  | 2.19451500  | 0.17567000  | H  | 2.43248600  | -4.39169100 | 1.67327000  |
| H  | 6.64269400  | 2.14639900  | 0.30687400  | H  | 1.32886400  | -4.11408000 | 3.02343500  |
| C  | 4.95903300  | 1.52618300  | -0.88296800 | H  | 0.98704600  | -5.39207900 | 1.85396400  |
| H  | 5.56274700  | 0.94694300  | -1.57715500 | C  | -2.79768800 | -2.32618800 | 0.16953100  |
| C  | 3.57196400  | 1.57646900  | -1.07675600 | C  | -3.39702100 | -3.01389900 | -0.91074000 |
| C  | 2.57064900  | 3.83019100  | 1.87721600  | C  | -4.78454100 | -2.93442400 | -1.06314400 |
| H  | 3.21996100  | 4.39120500  | 2.55669100  | H  | -5.25430800 | -3.46560000 | -1.88751700 |
| H  | 1.91284200  | 3.19346600  | 2.47871000  | C  | -5.56475900 | -2.19461400 | -0.17571900 |
| H  | 1.92290800  | 4.54642700  | 1.35853000  | H  | -6.64269300 | -2.14652900 | -0.30693900 |
| C  | 2.95544800  | 0.81962600  | -2.22976600 | C  | -4.95907900 | -1.52634700 | 0.88298600  |
| H  | 2.00166300  | 1.24127000  | -2.55345400 | H  | -5.56282900 | -0.94718800 | 1.57721000  |
| H  | 2.75618200  | -0.22415300 | -1.96137700 | C  | -3.57201100 | -1.57659300 | 1.07679600  |
| H  | 3.63779400  | 0.80481400  | -3.08658500 | C  | -2.57055200 | -3.83003200 | -1.87734100 |
| C  | -2.66022400 | 2.45648900  | -0.18703800 | H  | -3.21982800 | -4.39103000 | -2.55686400 |
| C  | -3.46481100 | 1.73459500  | -1.09110100 | H  | -1.91277300 | -3.19322500 | -2.47878100 |
| C  | -4.85140500 | 1.72658200  | -0.88720700 | H  | -1.92277600 | -4.54627100 | -1.35870400 |
| H  | -5.47753700 | 1.16831700  | -1.57867100 | C  | -2.95555600 | -0.81983400 | 2.22989400  |
| C  | -5.42838700 | 2.41076200  | 0.17718600  | H  | -2.00175100 | -1.24145600 | 2.55355200  |
| H  | -6.50622100 | 2.39517800  | 0.31666300  | H  | -2.75635000 | 0.22398600  | 1.96161800  |
| C  | -4.61931400 | 3.12743200  | 1.05778400  | H  | -3.63791600 | -0.80515400 | 3.08670400  |
| H  | -5.06666600 | 3.67442800  | 1.88425300  | C  | 2.66022300  | -2.45645300 | 0.18704800  |
| C  | -3.23113600 | 3.16482100  | 0.89551200  | C  | 3.46482000  | -1.73460400 | 1.09113800  |
| C  | -2.88259800 | 0.96865200  | -2.25581400 | C  | 4.85141200  | -1.72658500 | 0.88723200  |

|   |            |             |             |   |            |             |             |
|---|------------|-------------|-------------|---|------------|-------------|-------------|
| H | 5.47755300 | -1.16835700 | 1.57871800  | H | 2.73758900 | 0.08849900  | 2.00597900  |
| C | 5.42838400 | -2.41071300 | -0.17720100 | H | 1.90869600 | -1.34927700 | 2.56984700  |
| H | 6.50621600 | -2.39512400 | -0.31668700 | H | 3.56228400 | -1.00403900 | 3.11430500  |
| C | 4.61930100 | -3.12734000 | -1.05782400 | C | 2.37493100 | -3.96117500 | -1.85239400 |
| H | 5.06664500 | -3.67429800 | -1.88432400 | H | 1.73059700 | -3.30875700 | -2.45151900 |
| C | 3.23112400 | -3.16473700 | -0.89553900 | H | 3.00342700 | -4.54238200 | -2.53445000 |
| C | 2.88262500 | -0.96872300 | 2.25590100  | H | 1.71327700 | -4.65812000 | -1.32508300 |

## References:

### References:

- [1] M. J. Frisch, G. W. Trucks, H. B. Schlegel, G. E. Scuseria, M. A. Robb, J. R. Cheeseman, J. A. Montgomery, Jr., T. Vreven, K. N. Kudin, J. C. Burant, J. M. Millam, S. S. Iyengar, J. Tomasi, V. Barone, B. Mennucci, M. Cossi, G. Scalmani, N. Rega, G. A. Petersson, H. Nakatsuji, M. Hada, M. Ehara, K. Toyota, R. Fukuda, J. Hasegawa, M. Ishida, T. Nakajima, Y. Honda, O. Kitao, H. Nakai, M. Klene, X. Li, J. E. Knox, H. P. Hratchian, J. B. Cross, V. Bakken, C. Adamo, J. Jaramillo, R. Gomperts, R. E. Stratmann, O. Yazyev, A. J. Austin, R. Cammi, C. Pomelli, J. W. Ochterski, P. Y. Ayala, K. Morokuma, G. A. Voth, P. Salvador, J. J. Dannenberg, V. G. Zakrzewski, S. Dapprich, A. D. Daniels, M. C. Strain, O. Farkas, D. K. Malick, A. D. Rabuck, K. Raghavachari, J. B. Foresman, J. V. Ortiz, Q. Cui, A. G. Baboul, S. Clifford, J. Cioslowski, B. B. Stefanov, G. Liu, A. Liashenko, P. Piskorz, I. Komaromi, R. L. Martin, D. J. Fox, T. Keith, M. A. Al-Laham, C. Y. Peng, A. Nanayakkara, M. Challacombe, P. M. W. Gill, B. Johnson, W. Chen, M. W. Wong, C. Gonzalez, J. A. Pople, Gaussian 03, Revision E.01, Gaussian, Inc., Wallingford CT, (2004).
- [2] A. D. Becke, *J. Chem. Phys.* 98 (1993) 5648–5652.
- [3] (a) K. B. Wiberg, *Tetrahedron* 24 (1968), 1083–1096; (b) A. E. Reed, L. A. Curtiss, F. Weinhold, *Chem. Rev.* 88 (1988) 899–926.
